# Supplementary material for: Whole-Transcriptome Sequence Analysis of Verbena bonariensis in Response to Drought Stress
Source: PubMed Central journal article supplement (PMC6032440; doi:10.3390/ijms19061751), 2018-06-13
Supplement: ijms-19-01751-s001.pdf [file ijms-19-01751-s001.pdf]

**Table SA1.** Assessed statistics of six samples' sequencing data.

| Samples              | Read Number | Base Number | GC Content   | %≥Q30  |        |
|----------------------|-------------|-------------|--------------|--------|--------|
| Control group 1      | T01         | 25,189,726  | 7545,832,736 | 44.91% | 92.87% |
| Control group 2      | T02         | 23,985,897  | 7186,098,010 | 44.95% | 92.95% |
| Control group 3      | T03         | 25,666,923  | 7682,907,212 | 44.72% | 92.97% |
| experimental group 1 | T04         | 24,253,957  | 7261,480,372 | 44.43% | 93.02% |
| experimental group 2 | T05         | 25,483,372  | 7631,598,048 | 44.41% | 93.07% |
| experimental group 3 | T06         | 24,318,468  | 7283,574,304 | 44.46% | 93.10% |

**Table SA2.** Length distribution of the transcripts and unigenes clustered from *de novo* assembly.

| Length range | Transcript     | Unigene        |
|--------------|----------------|----------------|
| 200-300      | 57,750(22.36%) | 44,039(39.56%) |
| 300-500      | 45,715(17.70%) | 26,934(24.20%) |
| 500-1000     | 51,288(19.85%) | 19,318(17.35%) |
| 1000-2000    | 56,712(21.95%) | 12,826(11.25%) |
| 2000+        | 46,861(18.14%) | 8,196(7.36%)   |
| Total number | 258,32         | 111,313        |
| Total length | 294,409,787    | 77,594,018     |
| N50 length   | 1,951          | 1,223          |
| Mean length  | 1,139.683141   | 697.0795684    |

**Table SA3.** Annotated unigenes and DEGs of *Verbena bonariensis*.

| Term            | Unigene | DEGs  |
|-----------------|---------|-------|
| Total annotated | 53,757  | 4,165 |
| NR              | 51,325  | 4,155 |
| KOG             | 28,994  | 2,426 |
| COG             | 14,836  | 1,554 |
| GO              | 20,988  | 1,756 |
| KEGG            | 16,938  | 1,521 |
| Swiss-Prot      | 27,990  | 2,577 |
| eggNOG          | 47,283  | 3,957 |
| Pfam            | 32,735  | 3,419 |

**Table SA4.** The top five significantly enriched nodes of BP, MF and CC in GO..

| Term | GO. ID     | Term                                 | DEGs in term | All genes in term | FDR      |
|------|------------|--------------------------------------|--------------|-------------------|----------|
| BP   | GO:0015074 | DNA integration                      | 4            | 415               | 1.70E-12 |
|      | GO:0006278 | RNA-dependent DNA replication        | 6            | 301               | 6.70E-11 |
|      | GO:0009765 | photosynthesis, light harvesting     | 17           | 31                | 2.70E-08 |
|      | GO:0043581 | mycelium development                 | 18           | 68                | 1.10E-06 |
|      | GO:0006099 | tricarboxylic acid cycle             | 11           | 124               | 1.40E-05 |
| MF   | GO:0003676 | nucleic acid binding                 | 209          | 3,521             | 1.80E-12 |
|      | GO:0003964 | RNA-directed DNA polymerase activity | 6            | 317               | 2.30E-10 |
|      | GO:0016168 | chlorophyll binding                  | 14           | 23                | 7.90E-07 |
|      | GO:0003735 | structural constituent of ribosome   | 49           | 683               | 6.10E-05 |
|      | GO:0016717 | oxidoreductase activity etc.         | 6            | 36                | 0.00016  |
| CC   | GO:0000329 | fungal-type vacuole membrane         | 5            | 15                | 1.80E-05 |
|      | GO:0005840 | ribosome                             | 63           | 807               | 1.80E-05 |
|      | GO:0005634 | nucleus                              | 128          | 2,181             | 6.60E-05 |
|      | GO:0009523 | photosystem II                       | 18           | 37                | 8.30E-05 |
|      | GO:0009522 | photosystem I                        | 14           | 33                | 0.00014  |

**Table SA5.** The top ten significantly enriched pathways of DEGs in KEGG.

| KEGG ID | Pathway                                       | DEGs in pathway | All genes in pathway | FDR         |
|---------|-----------------------------------------------|-----------------|----------------------|-------------|
| ko00196 | Photosynthesis - antenna proteins             | 20              | 31                   | 7.90E-14    |
| ko00909 | Sesquiterpenoid and triterpenoid biosynthesis | 11              | 31                   | 7.12E-05    |
| ko00195 | Photosynthesis                                | 16              | 64                   | 0.000217806 |
| ko04626 | Plant-pathogen interaction                    | 52              | 344                  | 0.000394935 |
| ko00944 | Flavone and flavonol biosynthesis             | 4               | 9                    | 0.00671946  |
| ko00965 | Betalain biosynthesis                         | 3               | 5                    | 0.007224872 |
| ko00592 | alpha-Linolenic acid metabolism               | 16              | 88                   | 0.007560261 |
| ko01212 | Fatty acid metabolism                         | 29              | 200                  | 0.012548266 |
| ko00860 | Porphyrin and chlorophyll metabolism          | 14              | 79                   | 0.014940178 |
| ko00785 | Lipoic acid metabolism                        | 4               | 12                   | 0.020988586 |

**Table SA6.** Primers of qRT-PCR for validation of the selected DEGs.

| Gene ID         | Description                                                            | Primers                                                               |
|-----------------|------------------------------------------------------------------------|-----------------------------------------------------------------------|
| c74964.graph_c0 | Energy production and conversion                                       | F: GGAGAGGAGAGAGAGAGAAATGTGG<br>R: ATGAACTGGCAAACAACATGGAAG           |
| c77073.graph_c0 | light-harvesting complex II chlorophyll a/b binding protein 2 ( LHCb2) | F: ACACCAAGTCCAACAACATCACATAGAAG<br>R: TCGGCGGTTACAACCTTACAATGTTATTT  |
| c89561.graph_c0 | glutamine synthetase (GLUL)                                            | F: TTGCTCTGATATCGCTAGTCAGATAACC<br>R: CAATCAGCTATACATTCATTCACCTTTCAA  |
| c86830.graph_c0 | protein phosphatase 2C (PP2C)                                          | F: TTTATTCATGCAGCGTTTCTCTCGTATC<br>R: TATGACAGGGTTTTTTTAGCTCATTCTCA   |
| c75482.graph_c0 | mitogen-activated protein kinase 6 (MPK6)                              | F: AAAATTTCTTGCCTTAACATGAAGATTTAA<br>R: CAACAAATAACCAGACTCAAGAGGGAGTT |
| c83922.graph_c0 | bHLH transcription factor                                              | F: GTTAAAAATTTCTTGCCTTAACATGAAG<br>R: CTGAATCATAATGACACGTAAAATCCA     |
| c73643.graph_c1 | Lipid transport and metabolism                                         | F: CTTTCACAATGGCAGGTTTATACAGAG<br>R: GTATTCAACTGGTGGAGCTCTGTAGTAAG    |
| c87759.graph_c0 | Carbohydrate transport and metabolism                                  | F: AAGCTTTCACAATGGCAGGTTTATACAG<br>R: CTCTCTGTGTATCATCGATCATCATATTTA  |
| c56670.graph_c0 | C2H2 transcription factor                                              | F: GATGATGATGATGATGATGATGCTAATG<br>R: TTATATTTCTTTAGGGACATCAAACATG    |
| c82194.graph_c0 | Function unknown                                                       | F: GATGATGATGATGATGATGATGCTAATG<br>R: TACTCTTGTCTCTTGCTGCTTATGATTAT   |

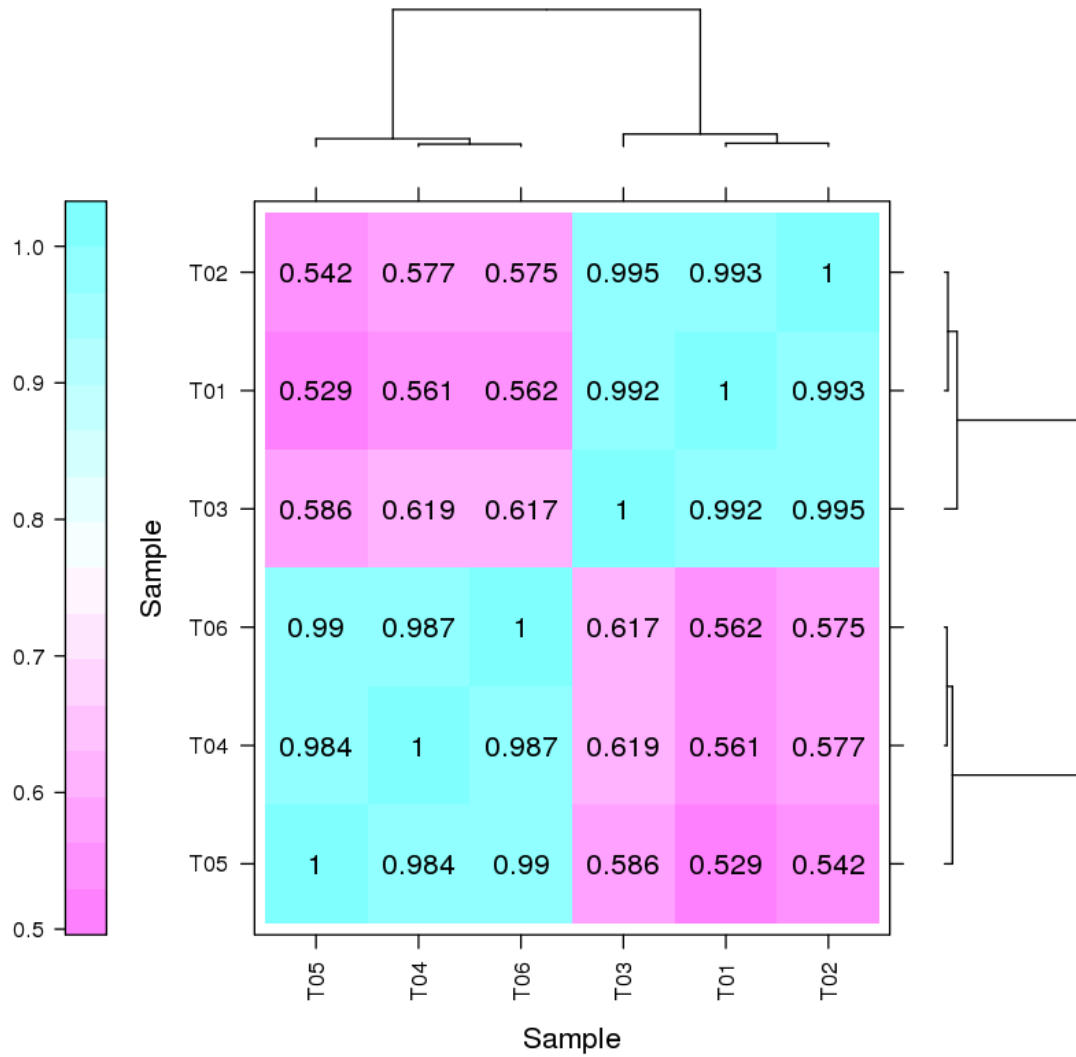

**Figure SA1.** The Pearson's Correlation Coefficient  $r$  between control and experiment samples. In this figure, different columns represent different samples, and different rows represent different genes. The color represents the base 2 logarithm of the FPKM expression level of the gene in the sample. Color from red to green means the correlation gradually increased. Clustering together with similar correlations.

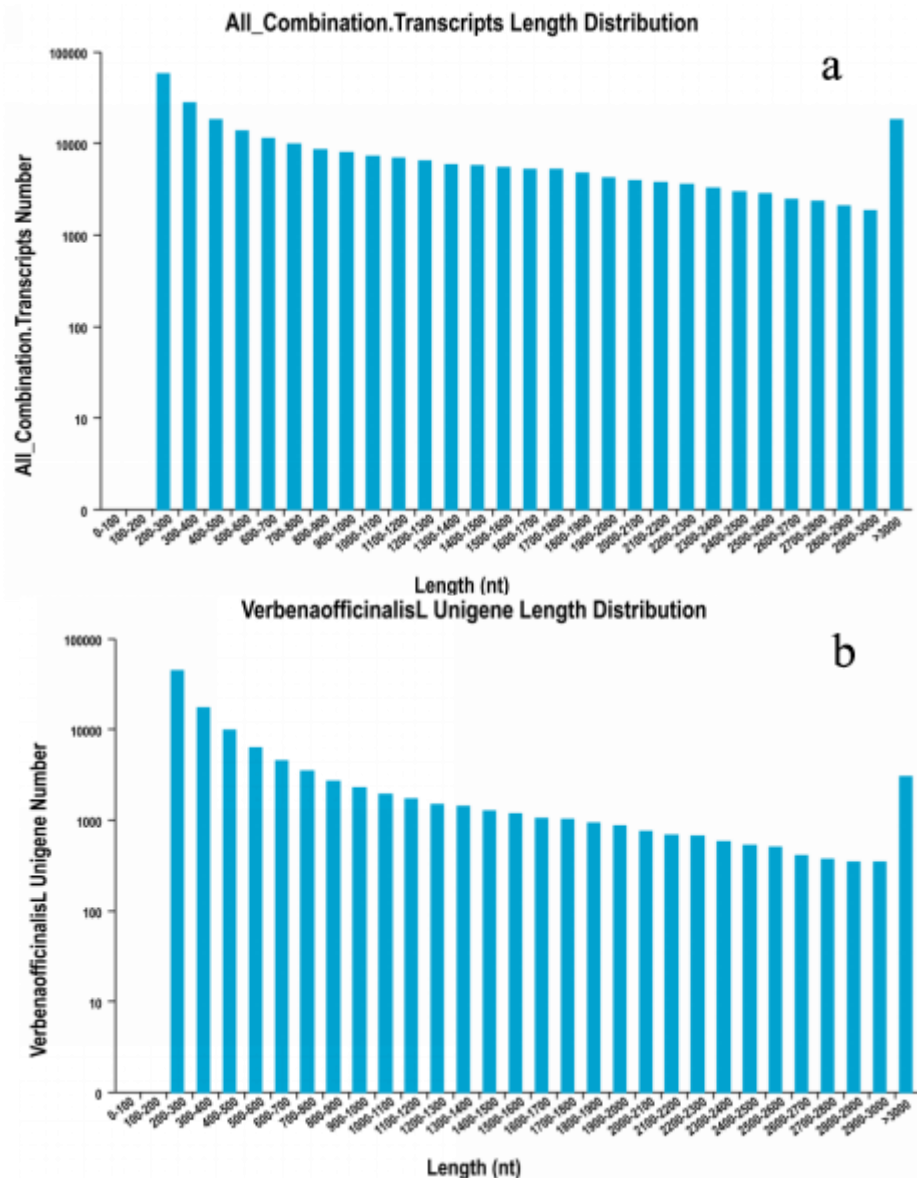

**Figure SA2.** (a) Length distribution of *Phormium tenax* transcripts. (b) Size distribution of *Phormium tenax* unigenes.

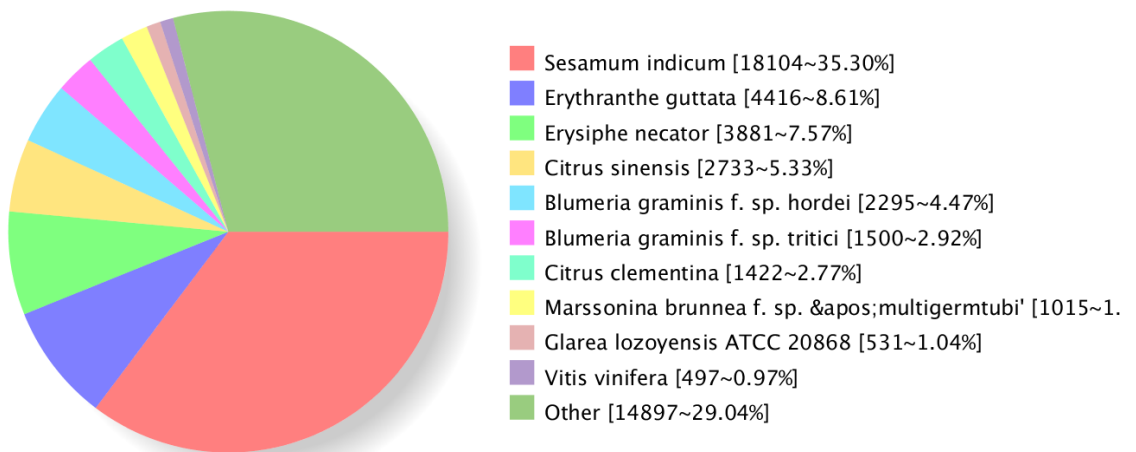

**Figure A3.** Nr homologous species distribution.

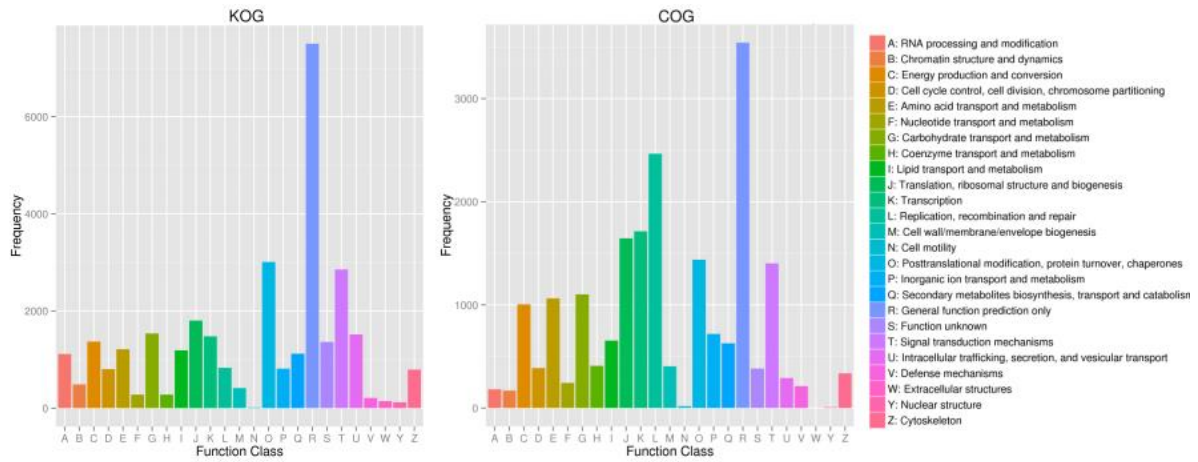

**Figure SA4.** KOG and COG function Classification of unigenes. The abscissa is the function classification of the database and the ordinate is the number of unigenes annotated in it.

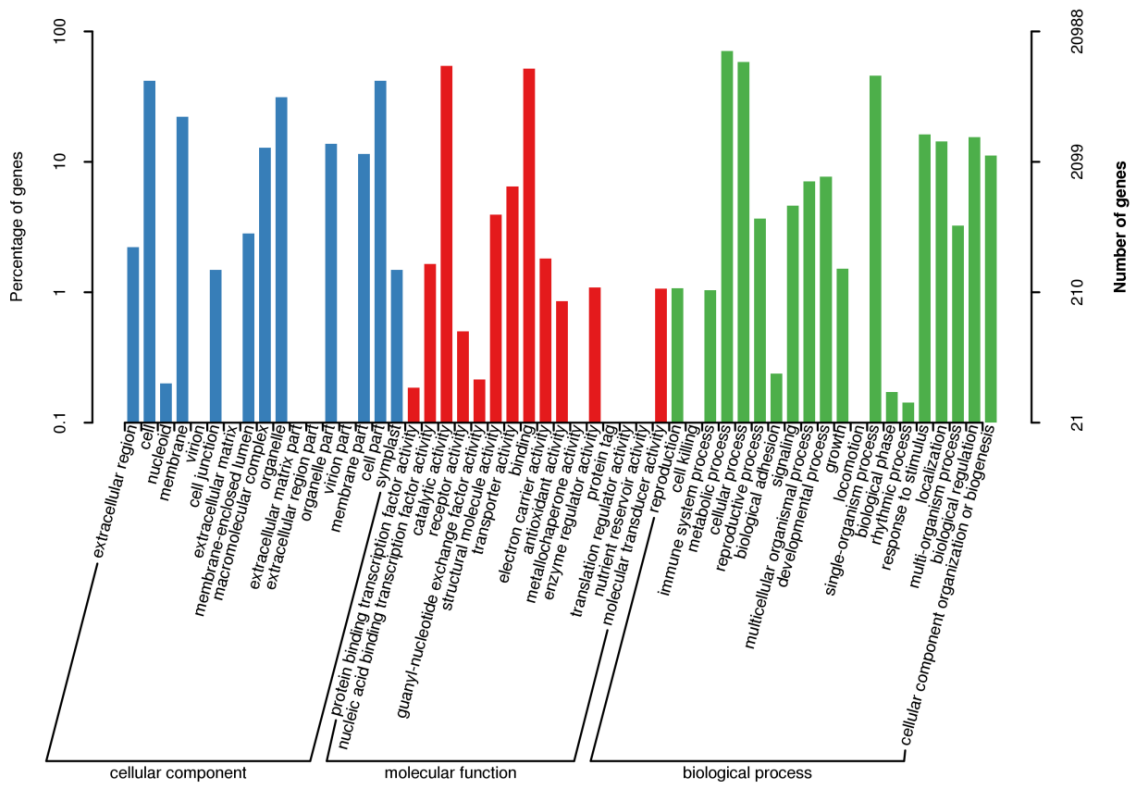

**Figure SA5.** GO classification of unigenes. The ordinate in the left represents the percentage of the number of genes, the right ordinate represents the number of unigenes. The abscissa is the classification of GO.

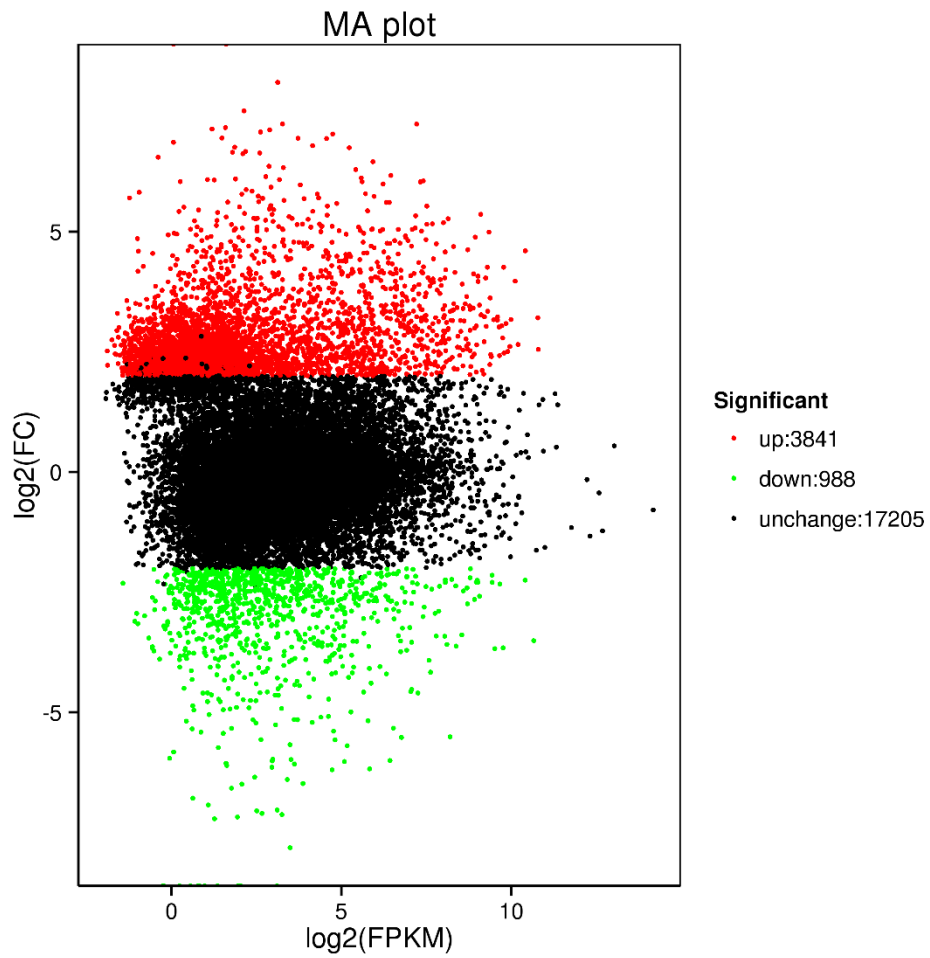

**Figure SA6.** Volcano map of DEGs. The abscissa is the value of  $\log_2$  (FPKM). The ordinate is the value of  $\log_2$ FC which means the difference of the expression level. Each point in the figure represents a gene, the green dots represent the down-regulation of gene expression and red dots represent the up-regulation of genes. Black dots represent no significant difference between the expression of the gene.

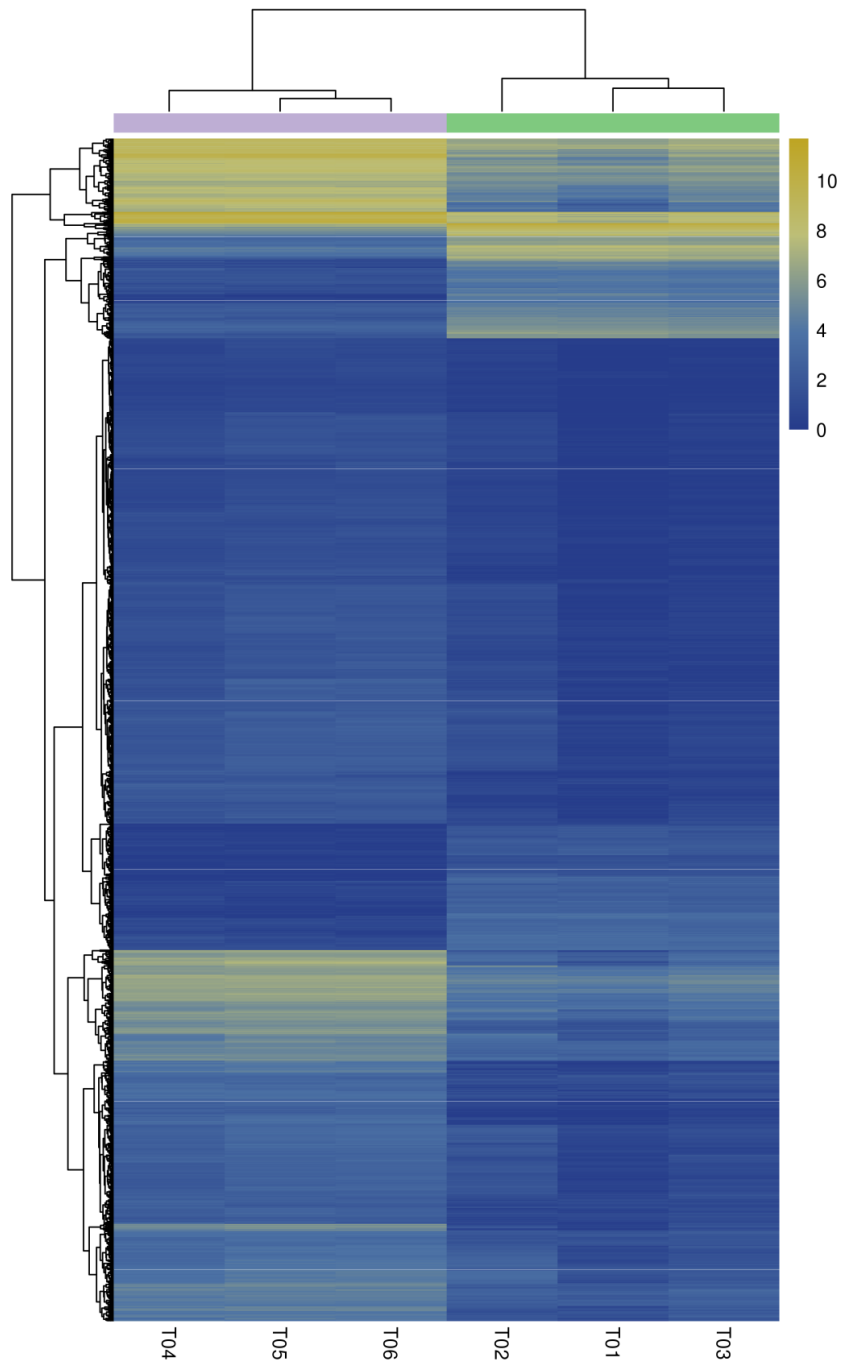

**Figure SA7.** The expression of all differentially expressed genes was clustered. The abscissa is the gene and the ordinate is the sample. Color represents the level of expression, From blue to yellow on behalf of the expression value from high to low.

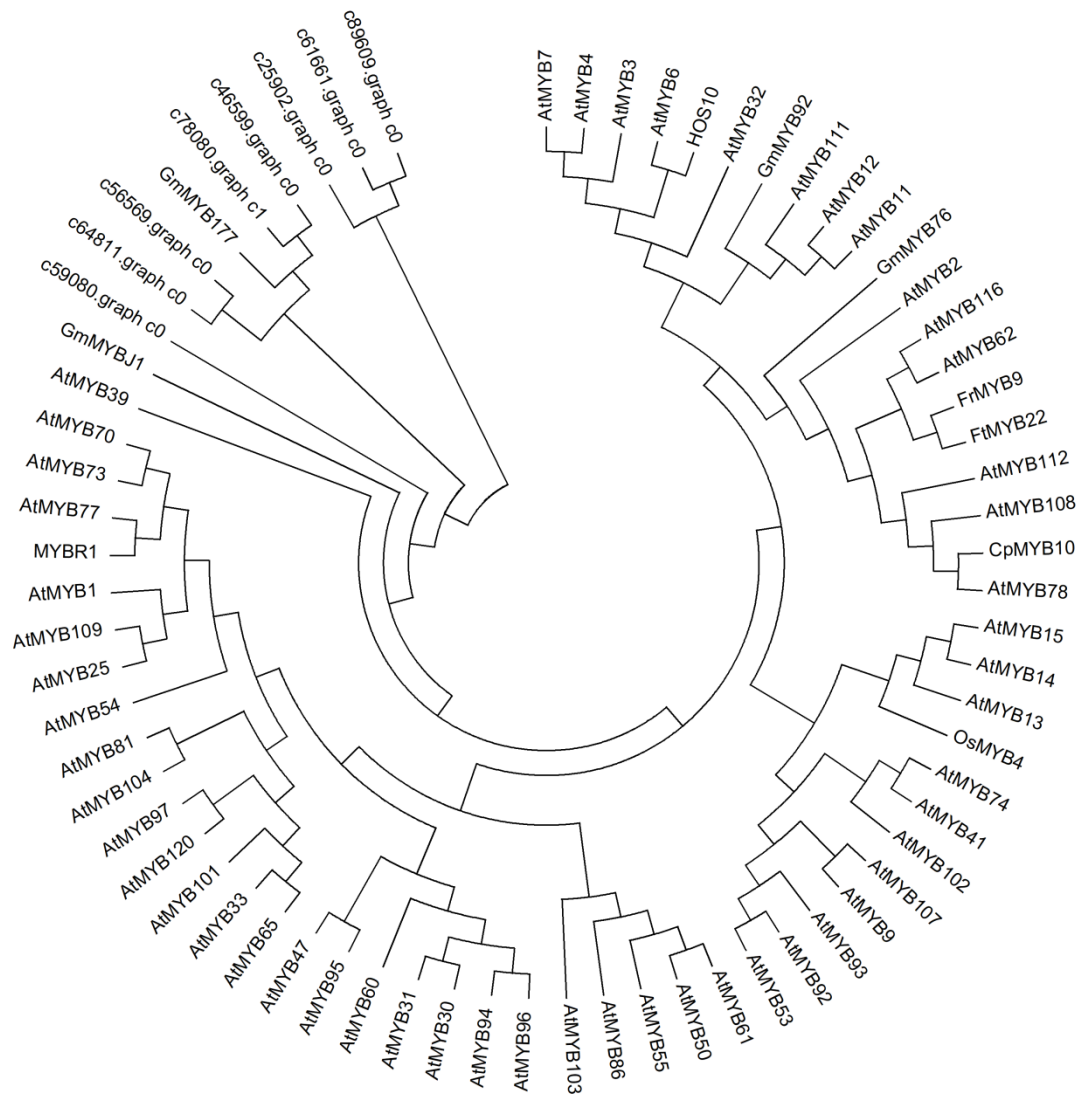

**Figure SA8.** The phylogenetic tree of MYB TF.
